# Supplementary material
Source: Royal Society of Chemistry journal article supplement (doi:10.1039/d6dd00153j)
Supplement: d6dd00153j1.pdf [file d6dd00153j1.pdf]

## Supplementary Information

*Uncertainty-Aware Active Learning Reveals Reliability Limits in Lead-Free Halide Perovskite Screening*

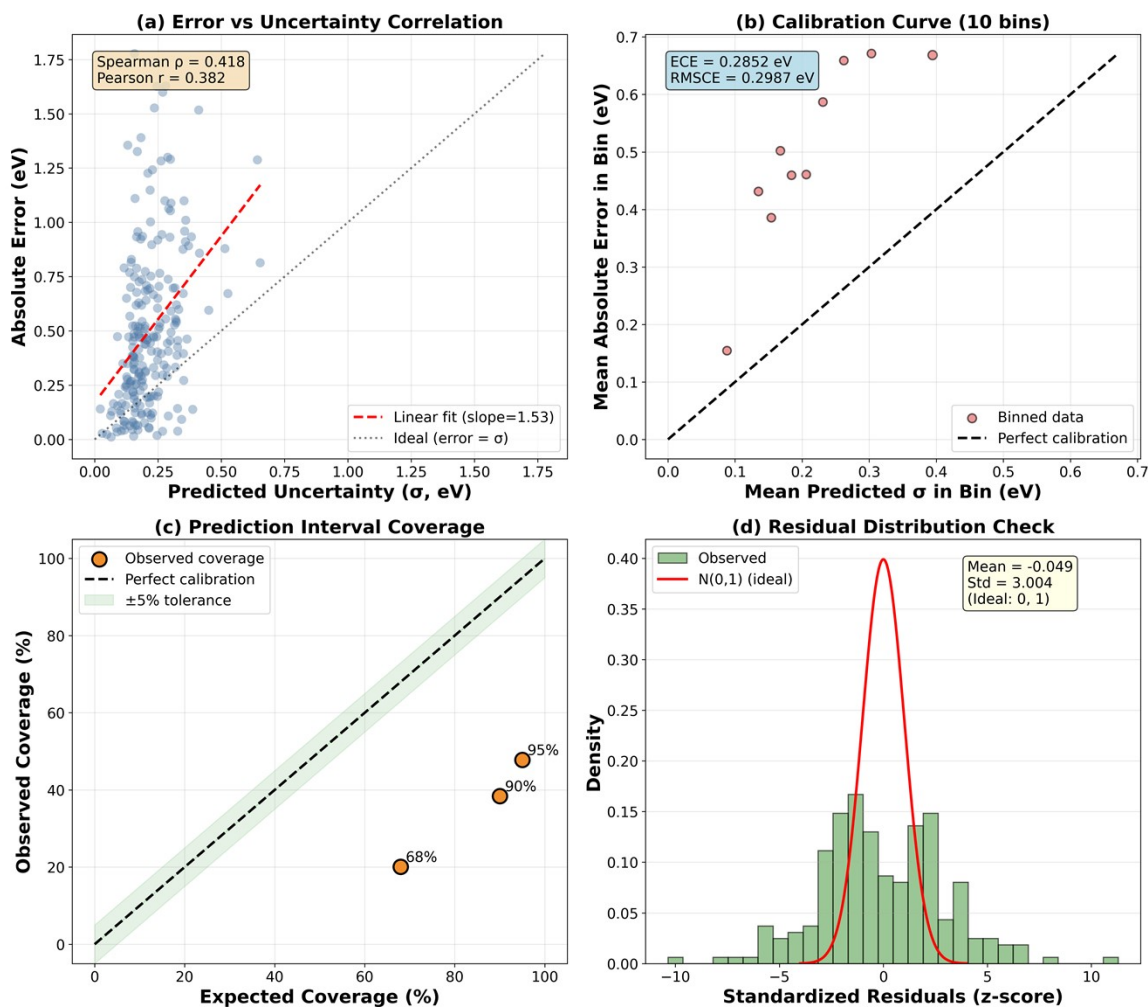

Fig. S1. Uncertainty calibration diagnostics on the held-out test set: (a) predicted  $\sigma$  vs. absolute error with Pearson and Spearman correlations; (b) expected vs. observed coverage for prediction intervals from 10% to 90%; (c) residual-normalised Z-score histogram compared to a standard normal.

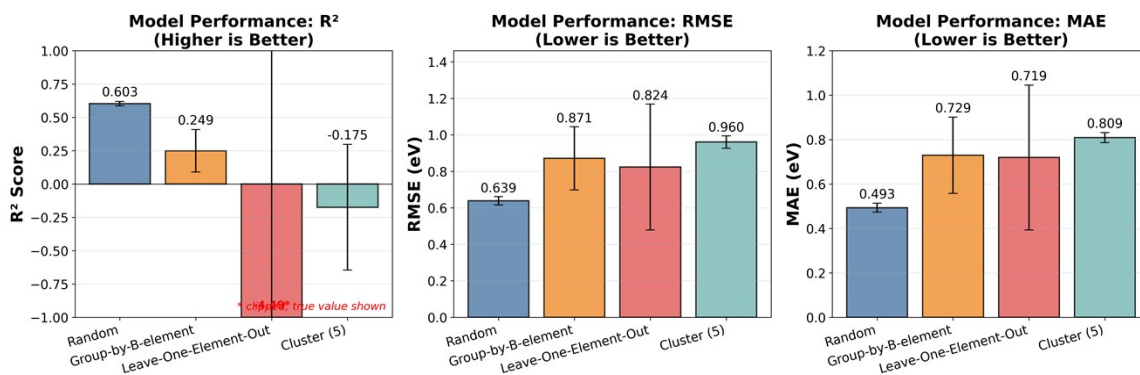

Fig. S2. Generalisation comparison under four data-splitting strategies: Random (80/20), GroupKFold by B-site cation, Leave-One-Element-Out (LOEO), and feature-space KMeans clustering. Panels show (a) R<sup>2</sup>, (b) RMSE, and (c) MAE with error bars from 5-fold cross-validation. Numerical values are annotated above each bar.

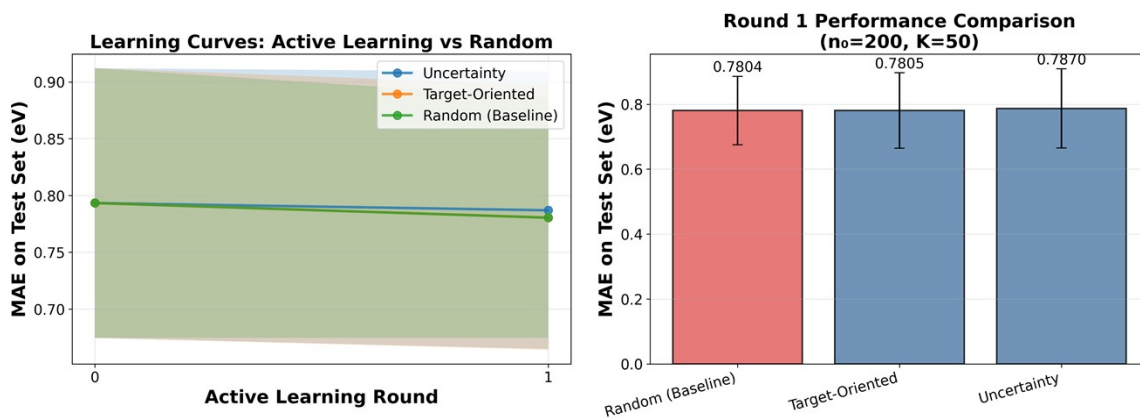

Fig. S3. Retrospective pool-based active learning simulation over six acquisition rounds (n<sub>o</sub> = 200, K = 50 per round). Comparison of Random, Uncertainty, Greedy, and Hybrid acquisition strategies; y-axis shows relative MAE change (%) from the initial model.

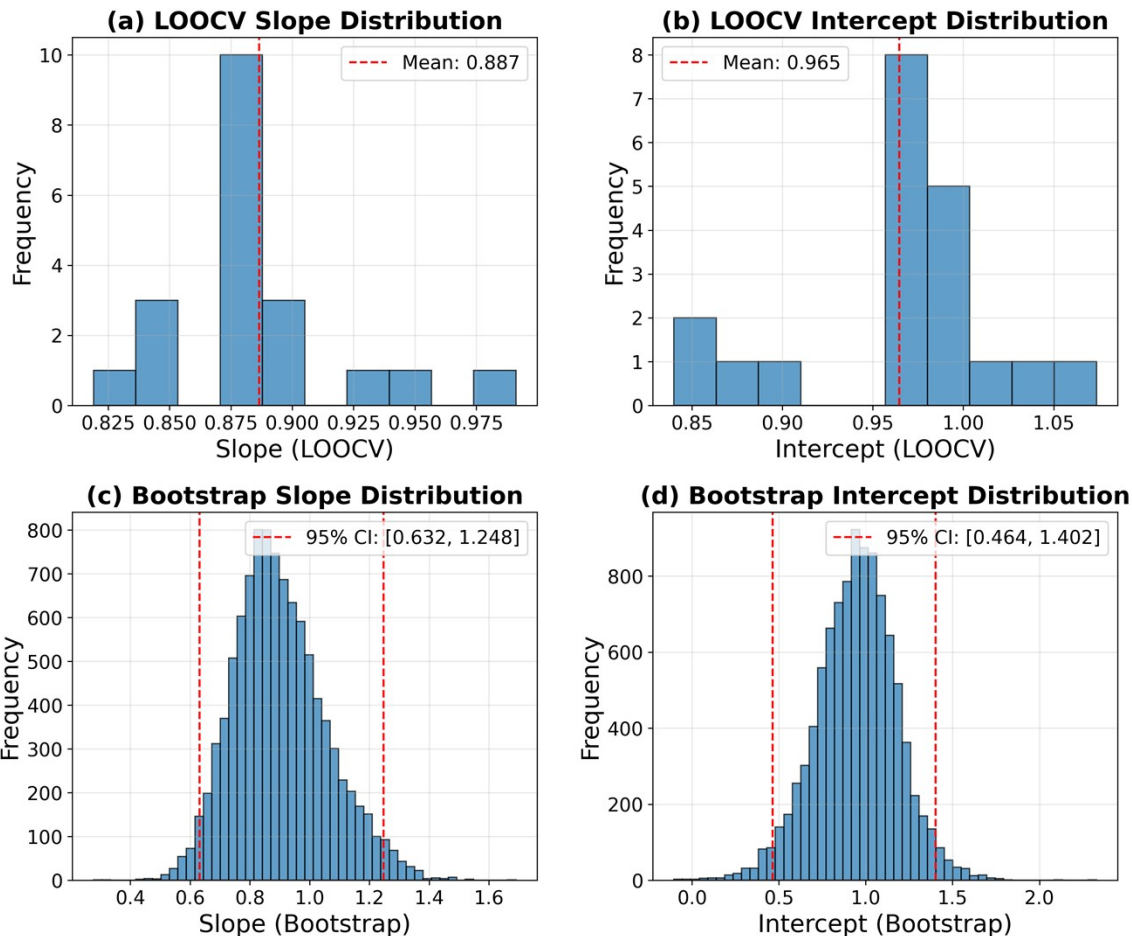

Fig. S4. Calibration robustness diagnostics: (a) leave-one-out cross-validation (LOOCV) of the 20-compound calibration set, showing predicted vs. actual experimental band gap for each held-out compound; (b) bootstrap distribution of slope and intercept (10,000 resamples) with 95% confidence intervals.

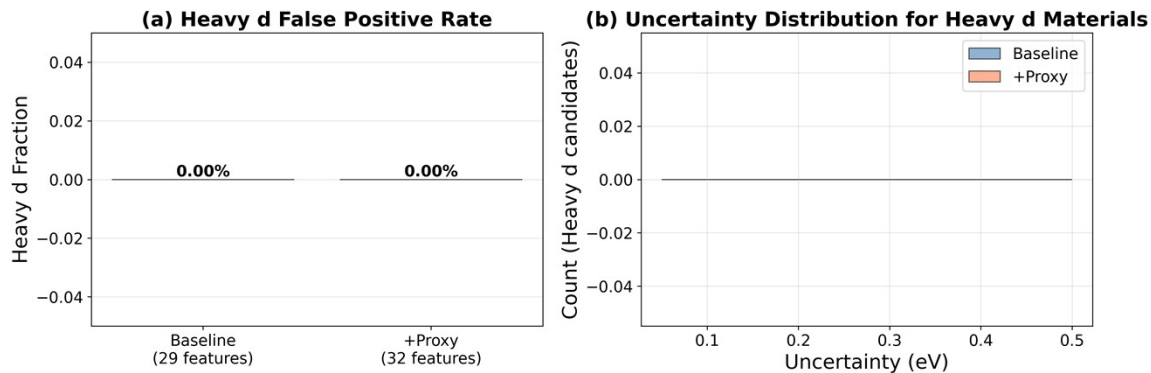

Fig. S5. Proxy feature ablation: fraction of heavy d/p-element compounds in the ML-priority set under the baseline 29-feature model vs. the proxy-augmented model (35+ descriptors including SOC proxy, d-electron count, and Madelung-like terms).

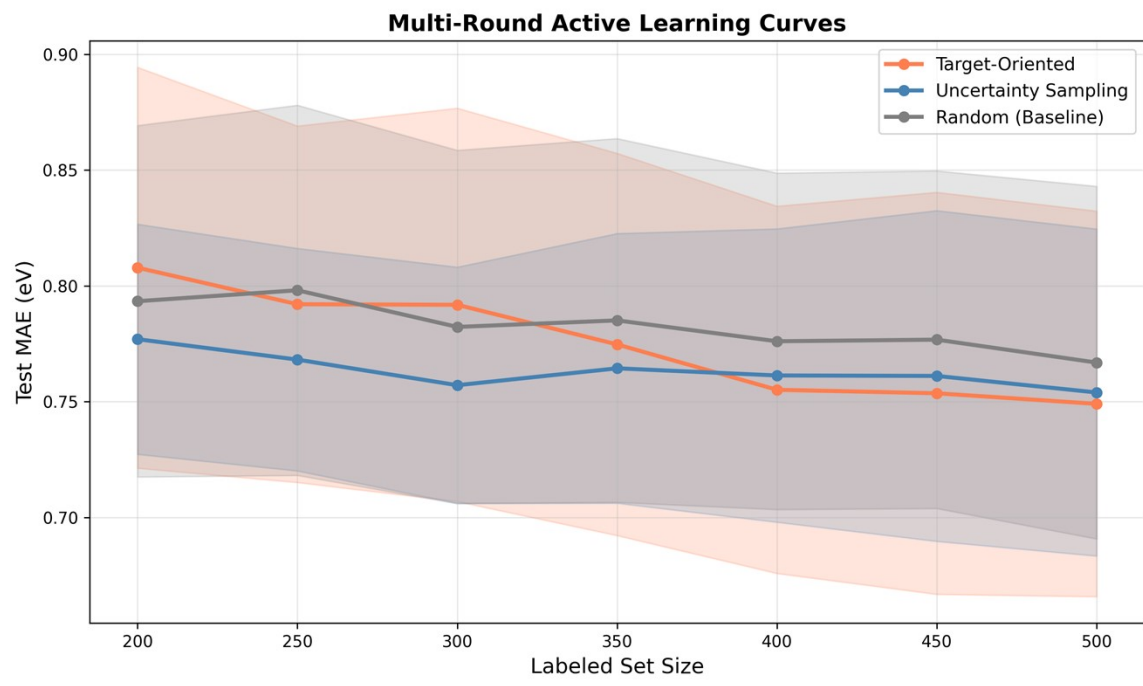

Fig. S6. Multi-round active learning curves showing MAE trajectory over 6 acquisition rounds for each strategy (Random, Uncertainty, Greedy, Hybrid), averaged over 10 seeds with  $\pm 1$  standard-error bands.

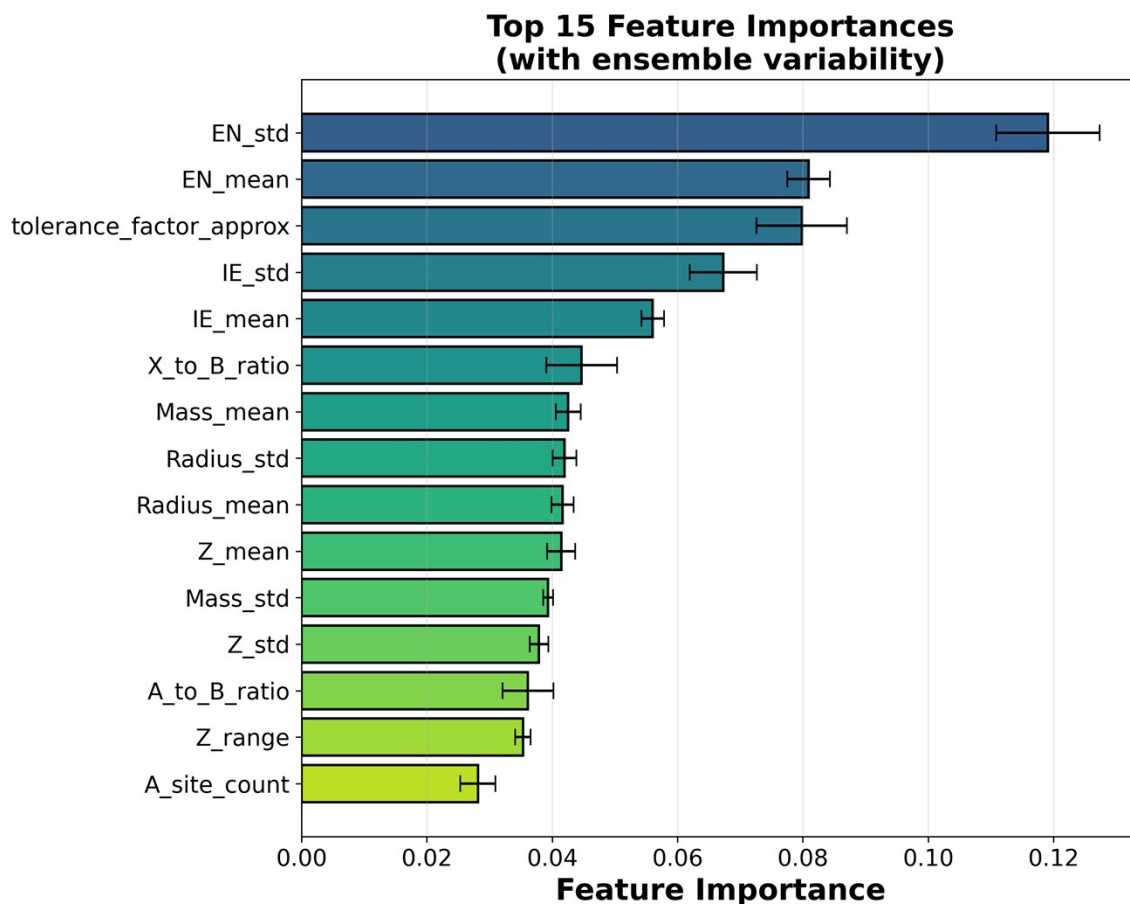

Fig. S7. Feature importance ranked by mean ensemble variability (standard deviation of feature importances across 15 ensemble members). Top-10 features are highlighted.

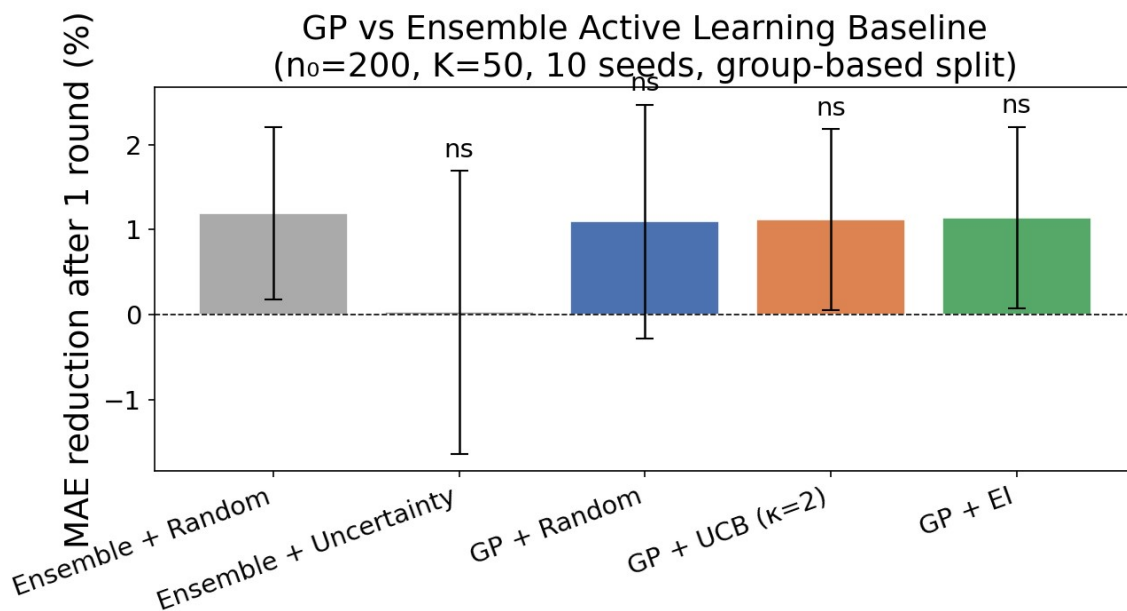

Fig. S8. GP vs. ensemble active learning baseline comparison. Mean MAE reduction (%) after one acquisition round ( $n_0 = 200$ ,  $K = 50$  additional points) across 10 random seeds, for five acquisition strategies: Ensemble + Random (grey), Ensemble + Uncertainty (dark grey), GP + Random (blue), GP + UCB  $\kappa = 2$  (orange), and GP + EI (green). Error bars show  $\pm 1$  standard error across seeds. 'ns' indicates no significant difference from the Ensemble + Random baseline (paired t-test, all  $p > 0.9$ ).

**Table S1. Complete list of 29 compositional descriptors used as model input features.**

| #  | Feature Name               | Description                                                             |
|----|----------------------------|-------------------------------------------------------------------------|
| 1  | mean_AtomicRadius          | Weighted mean atomic radius (Å)                                         |
| 2  | std_AtomicRadius           | Weighted std of atomic radius                                           |
| 3  | mean_Electronegativity     | Weighted mean Pauling electronegativity                                 |
| 4  | std_Electronegativity      | Weighted std of electronegativity                                       |
| 5  | mean_AtomicWeight          | Weighted mean atomic mass (u)                                           |
| 6  | std_AtomicWeight           | Weighted std of atomic mass                                             |
| 7  | mean_MeltingPoint          | Weighted mean melting point (K)                                         |
| 8  | std_MeltingPoint           | Weighted std of melting point                                           |
| 9  | mean_AtomicNumber          | Weighted mean atomic number Z                                           |
| 10 | std_AtomicNumber           | Weighted std of Z                                                       |
| 11 | mean_FirstIonizationEnergy | Weighted mean first IE (eV)                                             |
| 12 | std_FirstIonizationEnergy  | Weighted std of first IE                                                |
| 13 | num_elements               | Number of distinct elements                                             |
| 14 | num_sites                  | Total number of formula units                                           |
| 15 | A_site_count               | Number of A-site atoms per formula unit                                 |
| 16 | B_site_count               | Number of B-site atoms per formula unit                                 |
| 17 | X_site_count               | Number of X-site (halide) atoms per formula unit                        |
| 18 | A_mean_radius              | Mean atomic radius of A-site elements                                   |
| 19 | B_mean_radius              | Mean atomic radius of B-site elements                                   |
| 20 | X_mean_radius              | Mean atomic radius of X-site (halide) elements                          |
| 21 | A_mean_EN                  | Mean electronegativity of A-site elements                               |
| 22 | B_mean_EN                  | Mean electronegativity of B-site elements                               |
| 23 | X_mean_EN                  | Mean electronegativity of X-site elements                               |
| 24 | tolerance_factor_approx    | Goldschmidt tolerance factor $t = (r_A + r_X) / [\sqrt{2} (r_B + r_X)]$ |
| 25 | is_double_perovskite       | Binary flag: 1 if two distinct B-site elements, else 0                  |
| 26 | halide_mix_I               | Fractional I content on X-site                                          |
| 27 | halide_mix_Br              | Fractional Br content on X-site                                         |
| 28 | halide_mix_Cl              | Fractional Cl content on X-site                                         |
| 29 | B_site_Z_range             | Range of atomic numbers across B-site elements                          |

**Table S2. The 20 inorganic benchmark compounds used for PBE-to-experimental band gap calibration.**

| Formula             | Type | PBE gap (eV) | Exp. gap (eV) | MP-ID    | Reference                                    |
|---------------------|------|--------------|---------------|----------|----------------------------------------------|
| CsSnI <sub>3</sub>  | Sn   | 0.258        | 1.31          | mp-27214 | Chung et al. Nature 485, 486 (2012)          |
| CsSnBr <sub>3</sub> | Sn   | 0.438        | 1.75          | mp-27537 | Stoumpos et al. Inorg. Chem. 52, 9019 (2013) |
| CsSnCl <sub>3</sub> | Sn   | 1.021        | 2.90          | mp-29241 | Stoumpos et al. Inorg. Chem. 52, 9019 (2013) |
| CsGeI <sub>3</sub>  | Ge   | 0.553        | 1.63          | mp-27800 | Stoumpos et al. Inorg. Chem. 54,             |

|                                                 |         |       |      |            |                                                      |
|-------------------------------------------------|---------|-------|------|------------|------------------------------------------------------|
|                                                 |         |       |      |            | 2757 (2015)                                          |
| CsGeBr <sub>3</sub>                             | Ge      | 0.952 | 2.32 | mp-28279   | Stoumpos et al. Inorg. Chem. 54, 2757 (2015)         |
| CsGeCl <sub>3</sub>                             | Ge      | 1.636 | 3.67 | mp-28786   | Stoumpos et al. Inorg. Chem. 54, 2757 (2015)         |
| Cs <sub>3</sub> Bi <sub>2</sub> I <sub>9</sub>  | Bi      | 1.451 | 2.03 | mp-27531   | Lehner et al. Angew. Chem. 54, 8546 (2015)           |
| Cs <sub>3</sub> Bi <sub>2</sub> Br <sub>9</sub> | Bi      | 2.015 | 2.60 | mp-29957   | Hoye et al. Chem. Eur. J. 22, 2605 (2016)            |
| Cs <sub>3</sub> Bi <sub>2</sub> Cl <sub>9</sub> | Bi      | 2.629 | 3.30 | mp-31131   | Hoye et al. Chem. Eur. J. 22, 2605 (2016)            |
| Cs <sub>3</sub> Sb <sub>2</sub> I <sub>9</sub>  | Sb      | 1.305 | 2.05 | mp-27466   | Saparov et al. Chem. Mater. 27, 5622 (2015)          |
| Cs <sub>3</sub> Sb <sub>2</sub> Br <sub>9</sub> | Sb      | 1.793 | 2.67 | mp-29568   | Vargas et al. J. Phys. Chem. Lett. 8, 1412 (2017)    |
| Cs <sub>3</sub> Sb <sub>2</sub> Cl <sub>9</sub> | Sb      | 2.422 | 3.56 | mp-31130   | Vargas et al. J. Phys. Chem. Lett. 8, 1412 (2017)    |
| Cs <sub>2</sub> AgBiBr <sub>6</sub>             | double  | 1.143 | 1.95 | mp-985241  | Slavney et al. J. Am. Chem. Soc. 138, 2138 (2016)    |
| Cs <sub>2</sub> AgBiCl <sub>6</sub>             | double  | 1.936 | 2.77 | mp-27163   | Slavney et al. J. Am. Chem. Soc. 138, 2138 (2016)    |
| Cs <sub>2</sub> AgInCl <sub>6</sub>             | double  | 2.266 | 3.23 | mp-862977  | Volonakis et al. J. Phys. Chem. Lett. 8, 772 (2017)  |
| Cs <sub>2</sub> AgSbBr <sub>6</sub>             | double  | 0.627 | 1.64 | mp-1102078 | Deng et al. Adv. Funct. Mater. 30, 2002131 (2020)    |
| Cs <sub>2</sub> SnI <sub>6</sub>                | vacancy | 0.300 | 1.26 | mp-676481  | Saparov et al. Chem. Mater. 28, 2315 (2016)          |
| Cs <sub>2</sub> SnBr <sub>6</sub>               | vacancy | 0.852 | 1.82 | mp-675760  | Kaltzoglou et al. J. Phys. Chem. C 120, 11777 (2016) |
| Cs <sub>2</sub> SnCl <sub>6</sub>               | vacancy | 1.795 | 3.90 | mp-30878   | Kaltzoglou et al. J. Phys. Chem. C 120, 11777 (2016) |
| Cs <sub>2</sub> PdBr <sub>6</sub>               | vacancy | 0.593 | 1.60 | mp-1079158 | Babu et al. J. Phys. Chem. C 124, 10580 (2020)       |
